# Supplementary material for: Preparation of hyaluronic acid nanospheres with synergistic charge reversal and active targeting for enhanced selective anticancer drug delivery
Source: Royal Society of Chemistry journal article supplement (doi:10.1039/d5nj04505c), 2026-01-01
Supplement: d5nj04505c1.pdf [file d5nj04505c1.pdf]

**Supporting information:**

**Preparation of targeting hyaluronic acid-based nanospheres with charge-reversal and their application in selective drug delivery**

Xubo Zhao<sup>†,\*</sup>, Yecheng Feng<sup>†</sup>, Ke Yan<sup>†</sup>, Wenjing Yang<sup>‡,\*</sup>,

<sup>†</sup>College of Chemistry, Zhengzhou University, Zhengzhou 450001, China

<sup>‡</sup>Department of Anesthesiology, Pain and Perioperative Medicine, The First Affiliated Hospital of Zhengzhou University, Zhengzhou 450052, China

\*Corresponding authors. E-mail addresses: [xbz2016@zzu.edu.cn](mailto:xbz2016@zzu.edu.cn) (X, Zhao), and [yangwj07@yeah.net](mailto:yangwj07@yeah.net) (W, Yang)

**This PDF file includes:**

**S1 SUPPLEMENTARY FIGURES**

**Figure S1** Depiction of the synthesis of TPE-HA-PLL-DMMA and its self-assembly in water.

**Figure S2** AIE of THPD NPs after incubation with MCF-7 cells.

**Figure S3** Zeta potentials of THPD NPs and DOX@THPD NPs at pH 6.8.

**Figure S4** Cell viability of the THPD NCs and the DOX@THPD NCs against LSECs cells for 24 h.

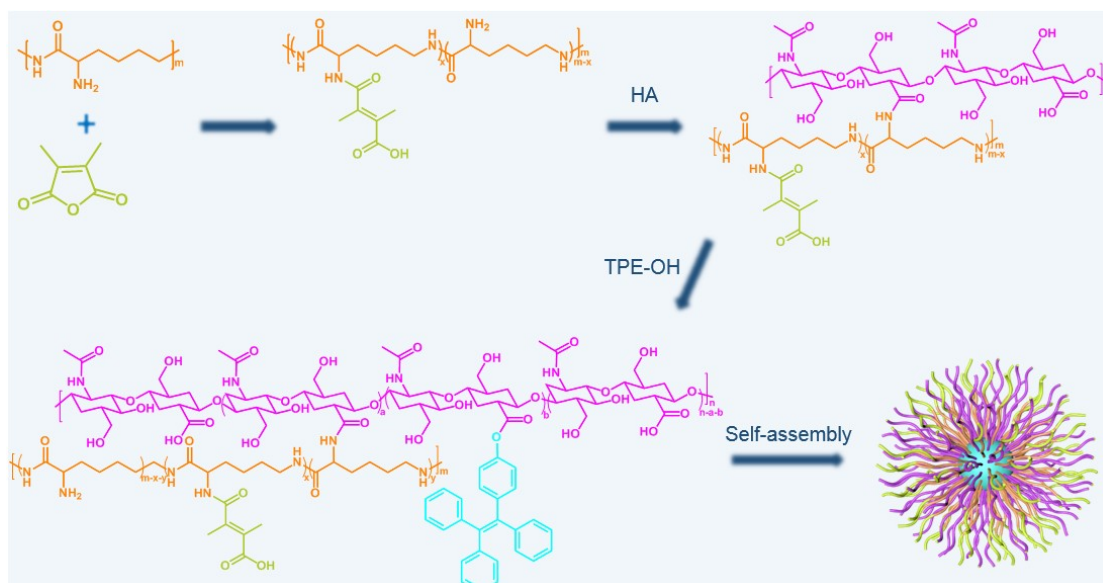

Figure S1 Depiction of the synthesis of TPE-HA-PLL-DMMA and its self-assembly in water.

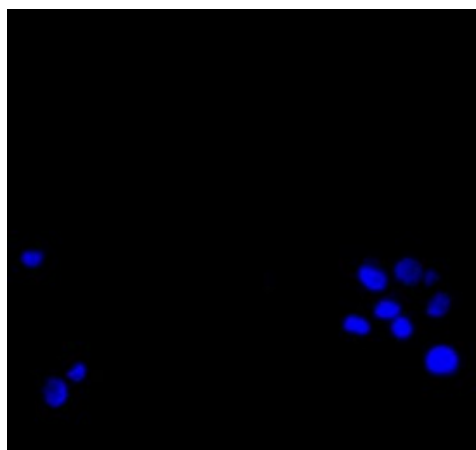

Figure S2 AIE of THPD NPs after incubation with MCF-7 cells.

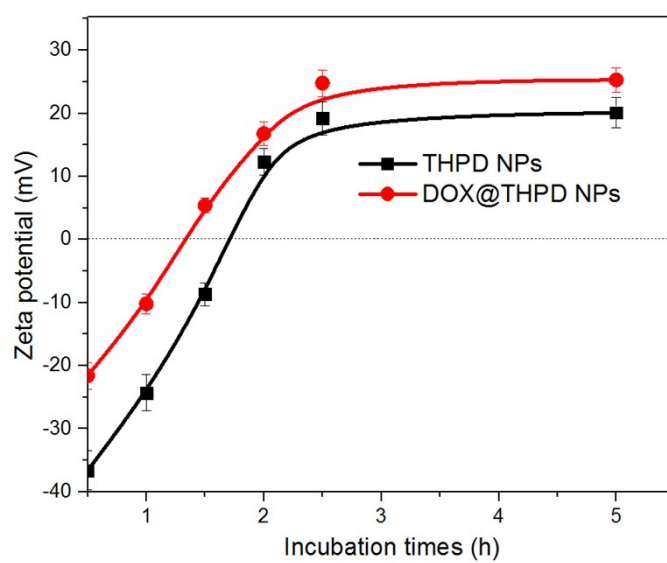

Figure S3 Zeta potentials of THPD NPs and DOX@THPD NPs at pH 6.8.

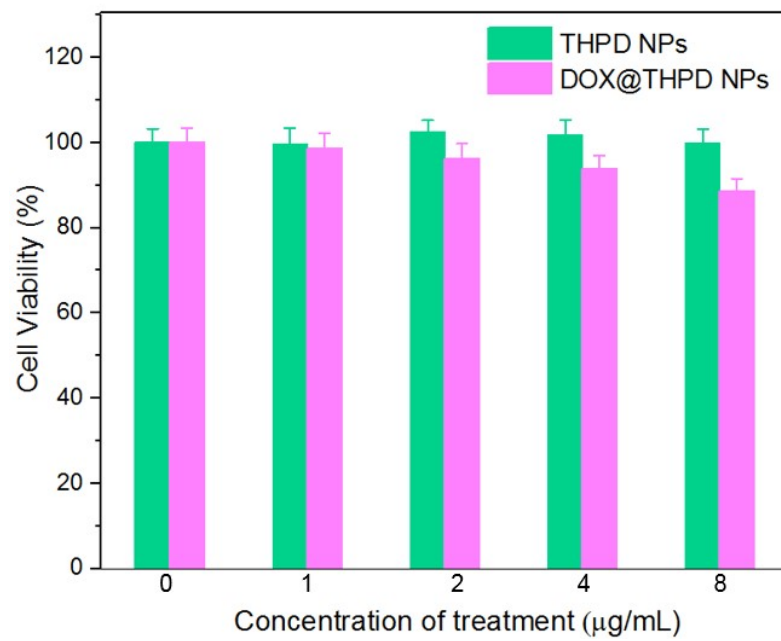

Figure S4 Cell viability of the THPD NCs and the DOX@THPD NCs against LSECs cells for 24

h.
